# Supplementary material for: Prognostic Significance of GPR55 mRNA Expression in Colon Cancer
Source: MDPI journal article supplement (doi:10.3390/ijms23094556), 2022-04-20
Supplement: s1 [file s1]

**Supplementary Table S1.** Comparative analysis of average survival time after surgery in CC patients with GPR55(-) and GPR55(+) without prognostic value

| Patient Group           | Category               | 5 Years Follow-Up after Surgery    |                        |                 | 12 Years Follow-Up after Surgery   |                        |                 |
|-------------------------|------------------------|------------------------------------|------------------------|-----------------|------------------------------------|------------------------|-----------------|
|                         |                        | Disease-free Survival <sup>a</sup> |                        |                 | Disease-free Survival <sup>a</sup> |                        |                 |
|                         |                        | Average<br>(Months)                | Difference<br>(Months) | <i>P</i> -value | Average<br>(Months)                | Difference<br>(Months) | <i>P</i> -value |
| CEA <sup>c</sup>        | GPR55 (-) <sup>b</sup> | 35                                 | 7                      | 0.586           | 56                                 | 8                      | 0.779           |
|                         | GPR55(+)               | 42                                 |                        |                 | 64                                 |                        |                 |
| CXCL16 <sup>d</sup>     | GPR55 (-)              | 56                                 | 2                      | 0.751           | 112                                | 3                      | 0.621           |
|                         | GPR55(+)               | 54                                 |                        |                 | 109                                |                        |                 |
| CXCL17 <sup>e</sup>     | GPR55 (-)              | 55                                 | 1                      | 0.949           | 109                                | 7                      | 0.169           |
|                         | GPR55(+)               | 56                                 |                        |                 | 116                                |                        |                 |
| GPR35 V2/3 <sup>f</sup> | GPR55 (-)              | 52                                 | 2                      | 0.649           | 101                                | 9                      | 0.167           |
|                         | GPR55(+)               | 54                                 |                        |                 | 110                                |                        |                 |
| LGR5 <sup>g</sup>       | GPR55 (-)              | 56                                 | 1                      | 0.855           | 109                                | 3                      | 0.328           |
|                         | GPR55(+)               | 55                                 |                        |                 | 112                                |                        |                 |

(a) Mean survival time after surgery calculated by cumulative survival analysis according to Kaplan-Meier model

(b) CC patients divided into two groups, GPR55(-) and GPR55(+) using a cutoff of 0.1365 mRNA copies/ 18S rRNA unit

(c) CC patient group with CEA mRNA levels above 3.67 mRNA copies/18S rRNA unit

(d) CC patient group with CXCL16 mRNA levels below 7.2 mRNA copies/18S rRNA unit

(e) CC patient group with CXCL17 mRNA levels above 0.0003 mRNA copies/18S rRNA unit

(f) CC patient group with GPR35 V2/3 mRNA levels below 11.7 mRNA copies/18S rRNA unit

(g) CC patient group with LGR5 mRNA levels below 0.062 mRNA copies/18S rRNA unit
